# Supplementary material for: Antitumor activity of the investigational B7-H3 antibody-drug conjugate, vobramitamab duocarmazine, in preclinical models of neuroblastoma
Source: PubMed Central journal article supplement — J Immunother Cancer. 2023 Sep 28;11(9):e007174. doi: 10.1136/jitc-2023-007174 (PMC10546160; doi:10.1136/jitc-2023-007174), 2023-09-28
Supplement: jitc-2023-007174supp001.pdf [file jitc-2023-007174supp001.pdf]

## Supplementary Figures and Legends

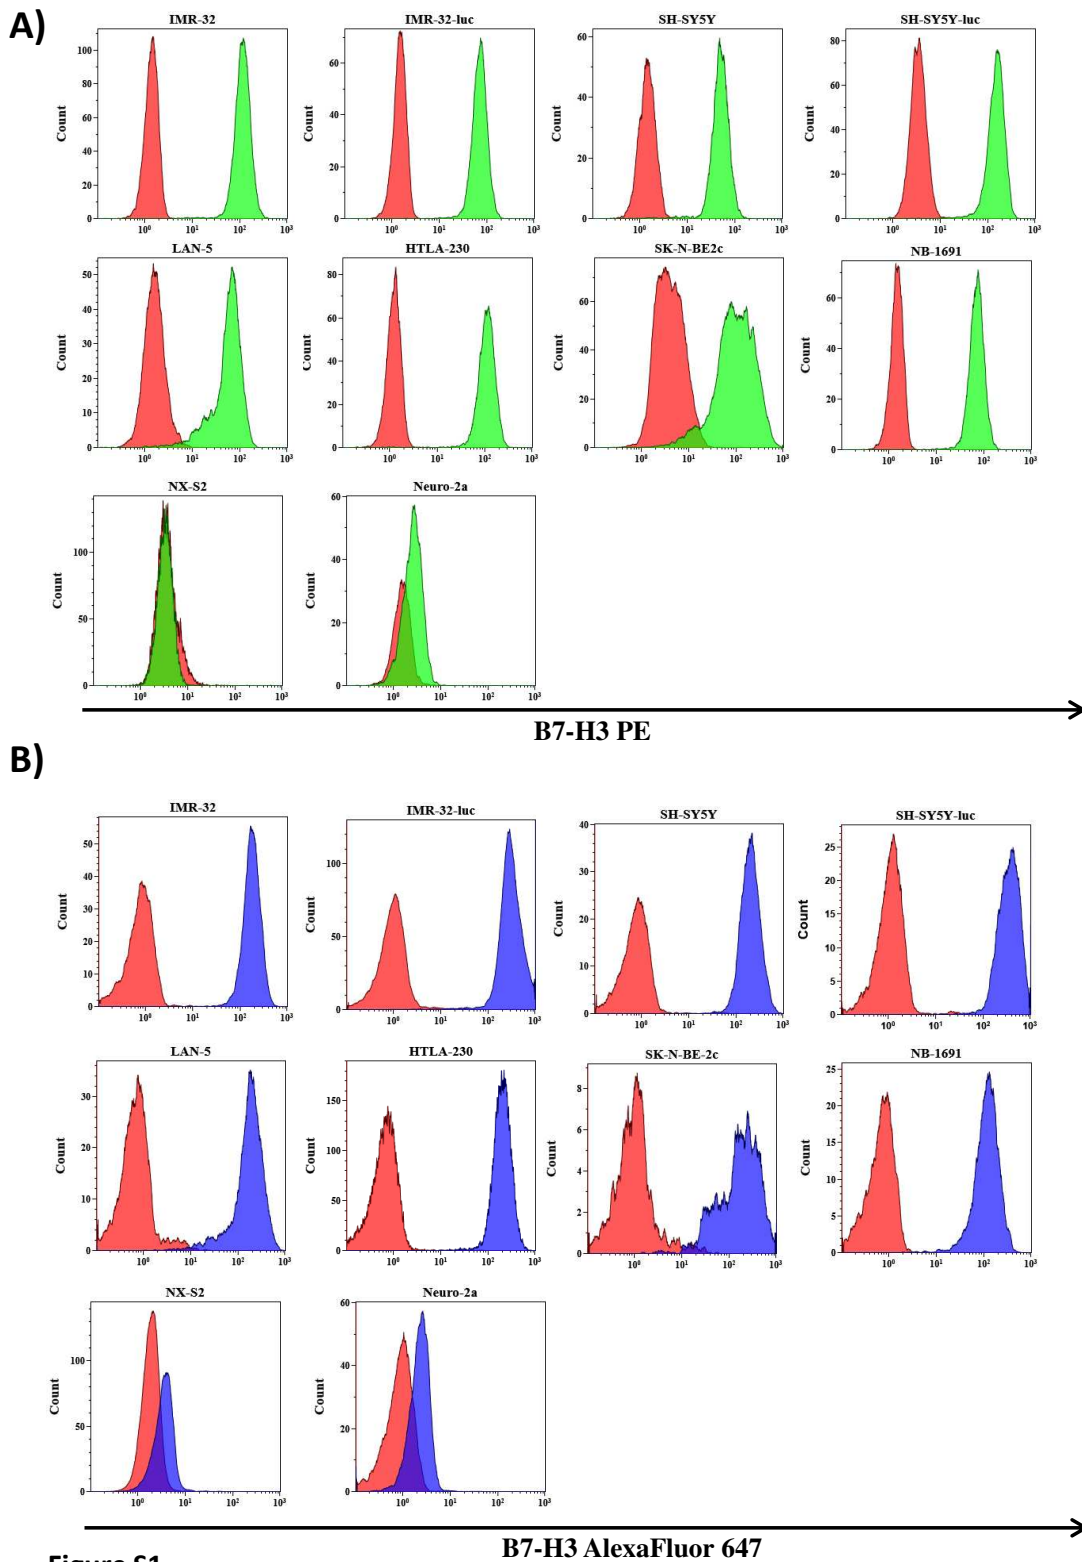

anti-human B7-H3 mAb. Green: cells labeled with PE-conjugated mouse IgG1 anti-B7-H3 mAb. Red: cells labeled with isotype-matched mouse IgG1 control mAb. **B)** Representative flow cytometry histograms of B7-H3 expression in human and murine NB cell lines stained with anti-B7-H3 AlexaFluor 647-conjugated humanized anti-human B7-H3 mAb, MGA017. Blue: cells labeled with AlexaFluor 647-conjugated MGA017 humanized anti-B7-H3 mAb. Red: unstained cells.

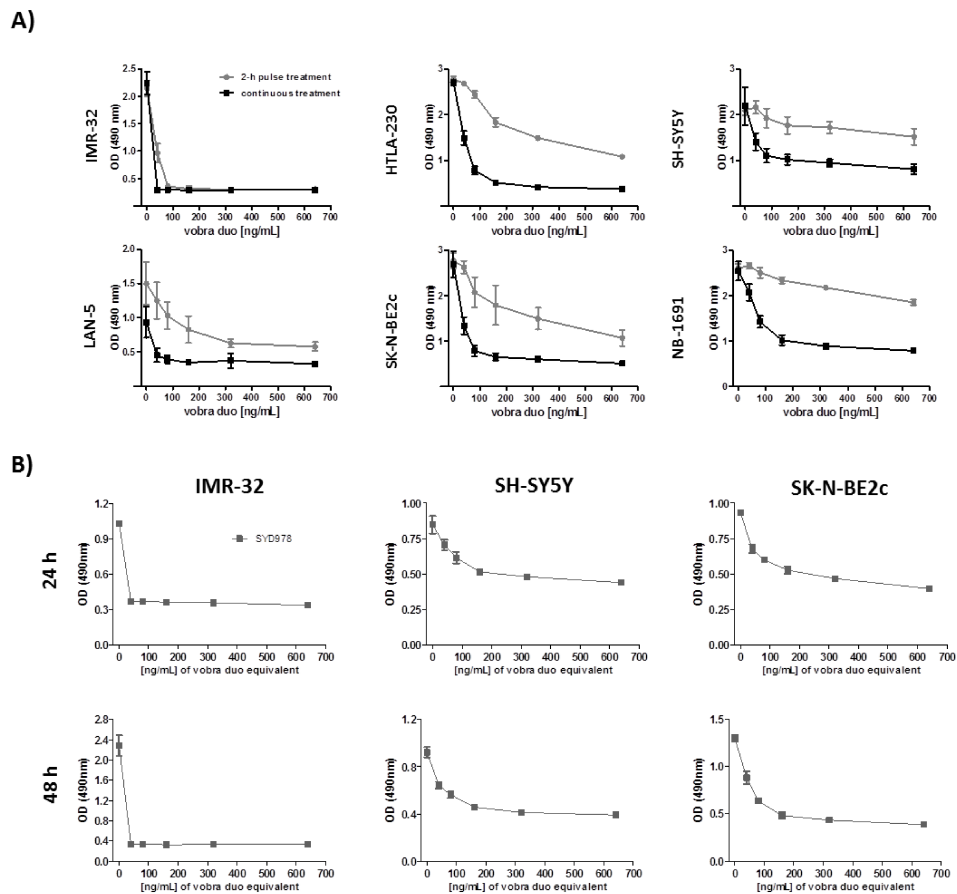

Figure S2

**Figure S2: Cytotoxic activity of vobra duo against a panel of human NB cell lines cultured in monolayers.** **A)** NB cell lines were treated with escalating concentrations of vobra duo (40-80-160-320-640 ng/mL) continuously for 5 days (black square) or for a 2h-pulse followed by a washing step and continued incubation (grey circles). **B)** IMR-32, SH-SY5Y, and SK-N-BE2c were treated with escalating concentration of the free payload, SYD978, for a 2h-pulse followed by a washing step and continuous incubation for additional 24 and 48 h. Viability was assessed by the MTS assay. Data are expressed as mean  $\pm$  SD. OD: optical density.

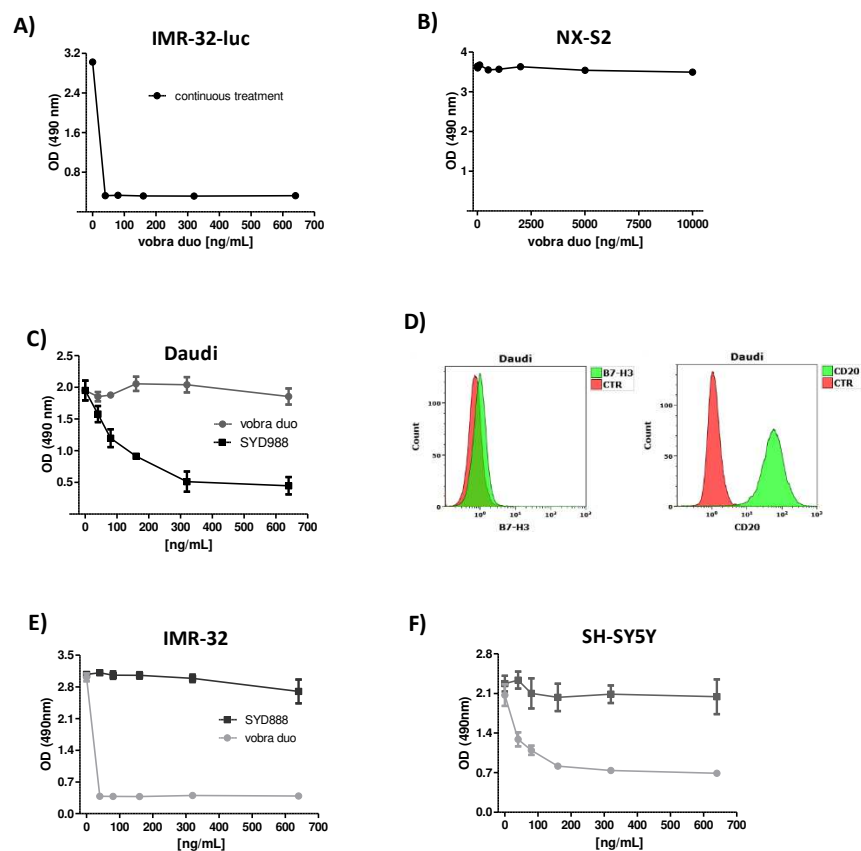

Figure S3

**Figure S3: Cytotoxic activity of vobra duo against a stable luciferase-transduced NB cell line that expresses B7-H3 or cell lines not expressing B7-H3. A, B)** Graphs showing the cell viability of IMR-32-luc and NX-S2 cells, respectively, after being exposed to vobra duo (A: 40-80-160-320-640 ng/mL; B: 10, 100, 500, 1000, 2000, 5000, 10000 ng/mL) for 7 days. Results of an MTS assay are shown, expressed as mean  $\pm$  SD. **C)** Cell viability (MTS assay) of Daudi cells treated with increasing doses (40, 80, 160, 320, 640 ng/mL) of anti-CD20-ADC (SYD988, black closed square) or anti-B7-H3-ADC (vobra duo, grey closed circle). Data are expressed as mean  $\pm$  SD. OD: optical density. **D)** Flow cytometry histograms representing the expression of B7-H3 and CD20 by Daudi cells. **E, F)** Graphs showing the cell viability of IMR-32 and SH-SY5Y cells after being exposed to dose escalation treatment (40, 80, 160, 320, 640 ng/mL) of anti-CD20-ADC (SYD988, black closed square) or anti-B7-H3-ADC (vobra duo, grey closed circle). Data are expressed as mean  $\pm$  SD. OD: optical density.

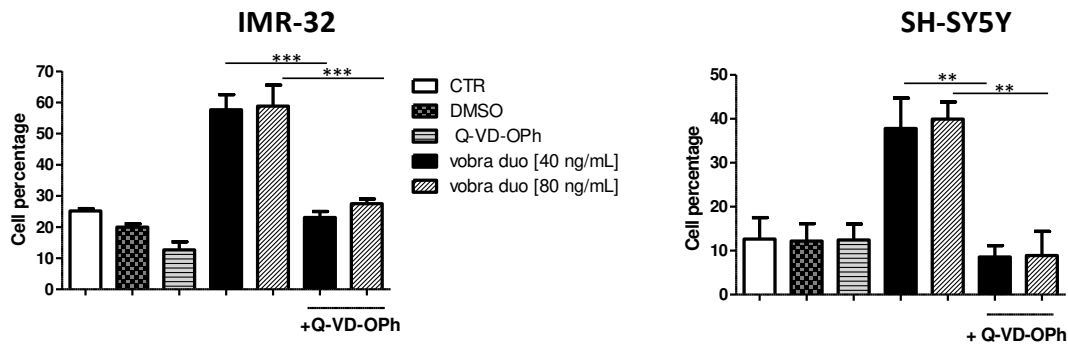

Figure S4

**Figure S4: Effect of pre-treatment with the pan-caspase inhibitor, Q-VD-OPh, on vobra duo-induced apoptosis.** Cells were preincubated with 30  $\mu$ M of the pan-caspase inhibitor, Q-VD-OPh, for 30 min prior to exposure to vobra duo. Apoptosis was measured as indicated in M&M. Data are expressed as mean % apoptotic cells  $\pm$  SD.

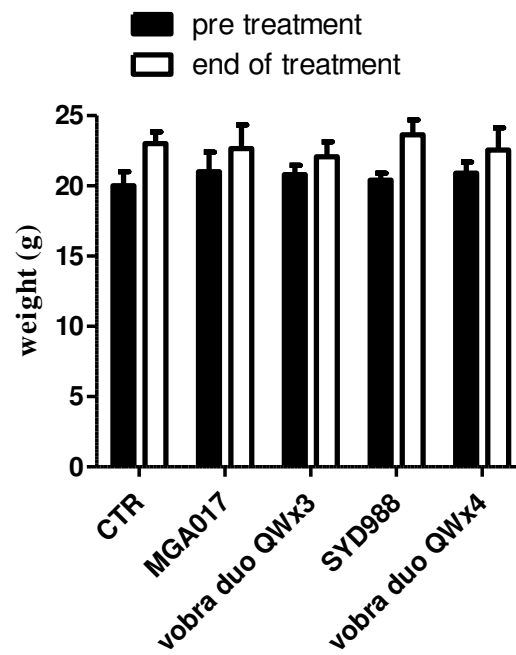

**Figure S5**

**Fig. S5: Mice body weight pre and after the end of treatments.**  $1 \times 10^6$  IMR-32-luc cells/10  $\mu$ L medium cells were orthotopically inoculated in the left adrenal gland of mice. Treatments started 7 days post cell inoculation (n=8 mice/group) and were performed as reported in Results. Untreated, control mice (CTR) received PBS. Results are presented as mean  $\pm$  SD.

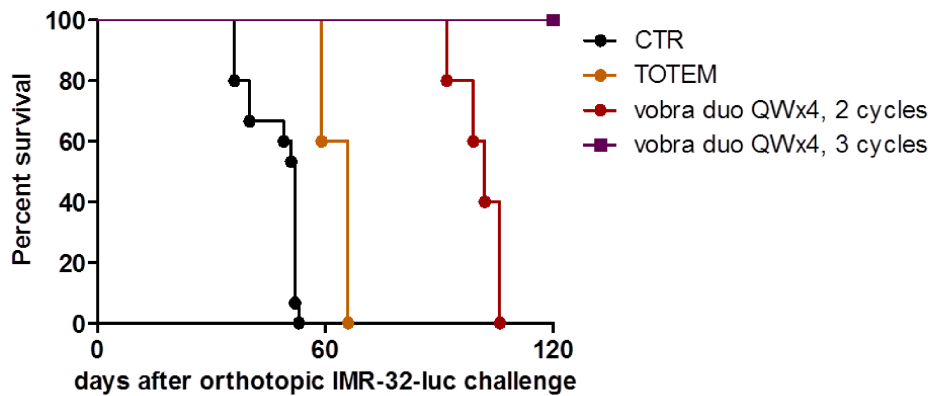

**Figure S6**

**Fig. S6 Treatment of TOTEM and repeat cycles of vobra duo in an orthotopic model of NB.** IMR-32-luc cells were orthotopically inoculated in the left adrenal gland of mice. Treatments (CTR, n=13 mice; TOTEM, vobra duo QWx4, 2 cycles and vobra duo QWx4, 3 cycles, n=5 mice/group) started 7 days post cell inoculation. Untreated, control mice (CTR) received PBS. Kaplan-Meier survival curves are shown.



**Figure S7 A**

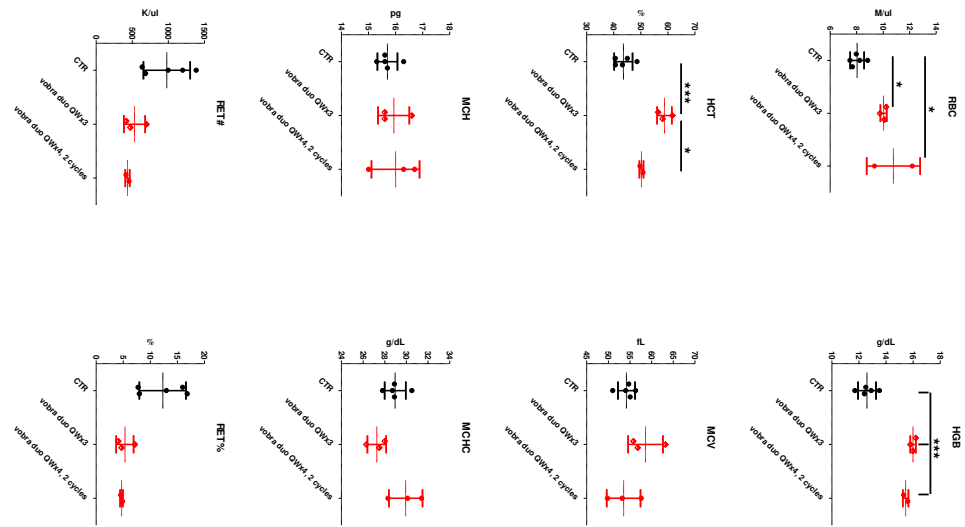

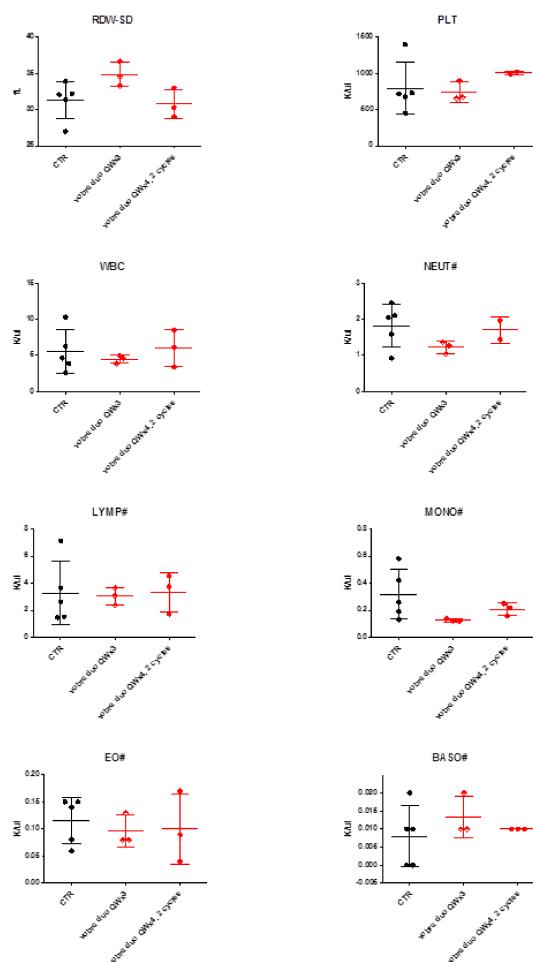

**Figure S7 B**

**Fig. S7A-B: Clinical hematology analyses in IMR-32-luc-bearing mice treated with vobra duo.**  $1 \times 10^6$  cells/ $10 \mu\text{l}$  medium were orthotopically injected in the left adrenal gland of mice ( $n = 3/\text{group}$ ). i.v. treatments (T) started 7 days post cells inoculation. Mice were treated with 1 mg/kg vobra duo QWx3 and vobra duo QWx4, 2 cycles. Hematological levels of red blood cells (RBC), hematocrit (HCT), MCH, reticulocytes (RET), hemoglobin (HGB), mean cell volume (MCV), mean corpuscular hemoglobin concentration (MCHC), red blood cell distribution width (RDW-SD), white blood cells (WBC) and platelets (PLT) were quantified. Tests were performed 24h after vobra duo QWx3, and 24h after 2 cycles of vobra duo QWx4. \* =  $p < 0.05$ , \*\*\* =  $p < 0.001$ .

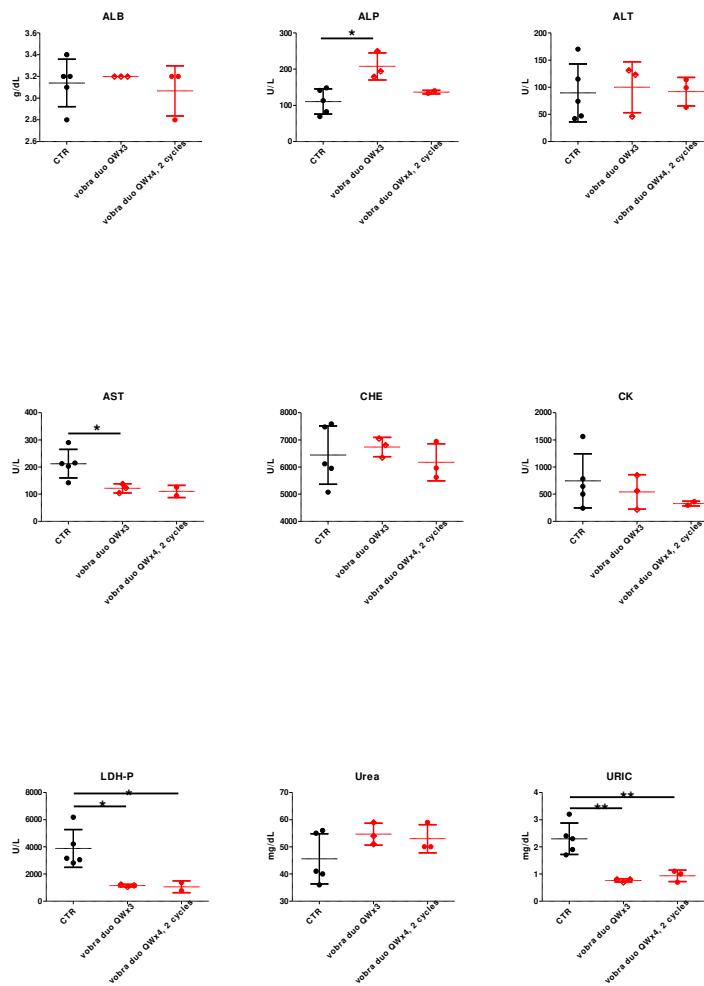

**Figure S8**

**Fig. S8: Clinical chemistry analyses in IMR-32-luc-bearing mice treated with vobra duo.**  $1 \times 10^6$  cells/ $10 \mu\text{l}$  medium were orthotopically injected in the left adrenal gland of mice ( $n = 3/\text{group}$ ). i.v. treatments (Ts) started 7 days post cells inoculation. Mice were treated with 1 mg/kg vobra duo QWx3 and vobra duo QWx4, 2 cycles. Clinical chemistry levels of serum albumin (ALB), phosphatase alkaline (ALP), glutamic-pyruvic transaminase (ALT), glutamic oxaloacetic transaminase (AST), cholinesterase (CHE), creatine phosphokinase (CK), lactate dehydrogenase (LDH-P), urea and uric acid (URIC) were quantified. Tests were performed 24h after vobra duo QWx3, and 24h after 2 cycles of vobra duo QWx4. \* =  $p < 0.05$ , \*\* =  $p < 0.01$ .
